# Supplementary material for: A comparison of the performance of bacterial biofilters and fungal–bacterial coupled biofilters in BTEp-X removal
Source: PeerJ journal article supplement (doi:10.7717/peerj.17452), 2024-06-17
Supplement: MIQE_checklist.xls [file MIQE_checklist.xls]

## Sheet: Sheet1
ITEM TO CHECK	IMPORTANCE	CHECKLIST	Page/line number
EXPERIMENTAL DESIGN
Definition of experimental and control groups	E	Experimental groups:biofilms
Number within each group	E	6
Assay carried out by core lab or investigator's lab?	D
Acknowledgement of authors' contributions	D
SAMPLE
Description	E	biofilm from a bacterial biofilter and a fungal–bacterial biofilter	14/292-295
Volume/mass of sample processed	D
Microdissection or macrodissection	E	Microdissection
Processing procedure	E	Each sample was immersed in 20 mL of sterilized water and vibrated for 10 min to remove biomass	8/149-151
If frozen - how and how quickly?	E	No
If fixed - with what, how quickly?	E	Not fixed.
Sample storage conditions and duration (especially for FFPE samples)	E	Samples were stored at –20°C until DNA extraction.	8/149-151
NUCLEIC ACID EXTRACTION
Procedure and/or instrumentation	E	Biofilms were sampled from the top layer, the middle layer and the bottom layer of the biofilter at designed intervals, respectively, and then be mixed. Each sample was immersed in 20 mL of sterilized water and vibrated for 10 min to remove biomass. The samples were then centrifuged at 15,000 rpm for 10 min.	8/149-151
Name of kit and details of any modifications	E	FastDNA® Spin Kit for Soil (MP Biomedicals, CA, USA) following the manufacturer’s instructions.	8/149-151
Source of additional reagents used	D
Details of DNase or RNAse treatment	E	Digestion of DNA was achieved with2 minutes incubation at 42 ℃.	8/149-151
Contamination assessment (DNA or RNA)	E	Not applicable.
Nucleic acid quantification	E	DNA concentration was assessed using spectrophotometry by measuring the absorbance at 260 nm UV light.	8/149-151
Instrument and method	E	Spectrophotometry (Eppendorf)
Purity (A260/A280)	D
Yield	D
RNA integrity method/instrument	E	Not applicable.
RIN/RQI or Cq of 3' and 5' transcripts	E	Not applicable.
Electrophoresis traces	D
Inhibition testing (Cq dilutions, spike or other)	E	The standard curve has been considered sufficient to rule out the presence of inhibitors of PCR taking into account the high quality of starting DNAs.
REVERSE TRANSCRIPTION
Complete reaction conditions	E	Reverse transcription was carried out in 20μl reaction volume. Briefly, 1μg total RNA, 2μl 5 gDNA Eraser Buffer, 1μl gDNA Eraser and nuclease-free water were mixed well and incubated for 2 min at 42°C to eliminate genomic DNA. For the synthesis of cDNA, 4μl 5 PrimeScript Buffer 2, 1μl PrimeScript RT Enzyme Mix 1, 1μl RT Primer Mix and 4μl nuclease-Free water were then added, and the reaction mixt…	8/149-151
Amount of RNA and reaction volume	E	Not applicable.
Priming oligonucleotide (if using GSP) and concentration	E	Oligo dTprimer: 50pmol/20μl reaction system
Reverse transcriptase and concentration	E	PrimeScript RT Enzyme Mix 1
Temperature and time	E
Manufacturer of reagents and catalogue numbers	D
Cqs with and without RT	D*
Storage conditions of cDNA	D
qPCR TARGET INFORMATION
If multiplex, efficiency and LOD of each assay.	E
Sequence accession number	E	1369F/1492R; FungiQuant-F/FungiQuant-R	8/149-151
Location of amplicon	D
Amplicon length	E	142bp/350bp
In silico specificity screen (BLAST, etc)	E
Pseudogenes, retropseudogenes or other homologs?	D
Sequence alignment	D
Secondary structure analysis of amplicon	D
Location of each primer by exon or intron (if applicable)	E	Not applicable.
What splice variants are targeted?	E
qPCR OLIGONUCLEOTIDES
Primer sequences	E	16S 1369F CGGTGAATACGTTCYCGG 1492R GGWTACCTTGTTACGACTT 142bp 18S FungiQuant-F GGRAAACTCACCAGGTCCAG FungiQuant-R GSWCTATCCCCAKCACGA 350bp	8/149-151
RTPrimerDB Identification Number	D
Probe sequences	D**
Location and identity of any modifications	E	No modifications were done.
Manufacturer of oligonucleotides	D
Purification method	D
qPCR PROTOCOL
Complete reaction conditions	E	qPCR was carried out with a Real-Time PCR System 96 (ABI Stepone plus, USA). Amplification was performed in a total volume of 20 μL using the following components: 10.0 μL of 2×SybrGreen qPCR Master Mix (Sangon Biotech (Shanghai) Co., Ltd, CHN), 0.4 μL of each primer (10 μ mol L−1), 2 μL of template DNA and 7.2 μL of ddH2O was prepared for amplification. Primer sets 1369F/1492R and FungiQuant-F/F…	8/149-151
Reaction volume and amount of cDNA/DNA	E	Reaction volume: 20ul; amount of DNA: 2ul.
Primer, (probe), Mg++ and dNTP concentrations	E	10μM Primers; 25mM MgCl2; 10 mM dNTP
Polymerase identity and concentration	E	TaqDNA(5U/μl)
Buffer/kit identity and manufacturer	E	Sangon Biotech (Shanghai) Co., Ltd, CHN
Exact chemical constitution of the buffer	D
Additives (SYBR Green I, DMSO, etc.)	E	SYBR Green I
Manufacturer of plates/tubes and catalog number	D
Complete thermocycling parameters	E	Initial denaturation:3 min at 95 °C followed by 45 cycles of melt for 15 s at 95 °C, anneal for 20 s at 57 °C and extension for 30 s at 72 °C	8/149-151
Reaction setup (manual/robotic)	D
Manufacturer of qPCR instrument	E	ABI Stepone plus
qPCR VALIDATION
Evidence of optimisation (from gradients)	D
Specificity (gel, sequence, melt, or digest)	E
For SYBR Green I, Cq of the NTC	E	SYBR Green I	8/149-151
Standard curves with slope and y-intercept	E
PCR efficiency calculated from slope	E
Confidence interval for PCR efficiency or standard error	D
r2 of standard curve	E
Linear dynamic range	E
Cq variation at lower limit	E
Confidence intervals throughout range	D
Evidence for limit of detection	E
If multiplex, efficiency and LOD of each assay.	E
DATA ANALYSIS
qPCR analysis program (source, version)	E	Quantification Software version 2.1 (Applied Biosystems, USA)
Cq method determination	E	The threshold was defined as the fractional cycle number at which the fluorescence exceeded the given threshold and was calculated using SDS Relative Quantification Software version 2.1 using the automatic baseline setting.
Outlier identification and disposition	E	Not applicable.
Results of NTCs	E	The signal of the amplification plot was very late (Cq>38) and therefore there was a high Cq value difference between the negative control and all the DNA samples.
Justification of number and choice of reference genes	E	Not applicable.
Description of normalisation method	E
Number and concordance of biological replicates	D
Number and stage (RT or qPCR) of technical replicates	E	qPCR reactions were performed in triplicate.
Repeatability (intra-assay variation)	E	Mean standard deviation of triplicates: less than 0.10.	8/149-151
Reproducibility (inter-assay variation, %CV)	D
Power analysis	D
Statistical methods for result significance	E
Software (source, version)	E	SPSS software (version 20.0)	8/149-151
Cq or raw data submission using RDML	D
Table 1. MIQE checklist for authors, reviewers and editors. All essential information (E) must be submitted with the manuscript. Desirable
information (D) should be submitted if available. If using primers obtained from RTPrimerDB, information on qPCR target, oligonucleotides,
protocols and validation is available from that source.
*: Assessing the absence of DNA using a no RT assay is essential when first extracting RNA. Once the sample has been validated as
RDNA-free, inclusion of a no-RT control is desirable, but no longer essential.
**: Disclosure of the probe sequence is highly desirable and strongly encouraged. However, since not all commercial pre-designed assay
vendors provide this information, it cannot be an essential requirement. Use of such assays is advised against.
