# Supplementary material for: A comparison of the performance of bacterial biofilters and fungal–bacterial coupled biofilters in BTEp-X removal
Source: PeerJ journal article supplement (doi:10.7717/peerj.17452), 2024-06-17
Supplement: RawDataExperiment.xlsx [file RawDataExperiment.xlsx]

## Sheet: Fig.2
			Fig 2
B					E					T					x-P
Time	REs of the B-BF/%	REs of the F&B-BF/%	MRs of the B-BF/%	MRs of the F&B-BF/%	Time	REs of the B-BF/%	REs of the F&B-BF/%	MRs of the B-BF/%	MRs of the F&B-BF/%	Time	REs of the B-BF/%	REs of the F&B-BF/%	MRs of the B-BF/%	MRs of the F&B-BF/%	Time	REs of the B-BF/%	REs of the F&B-BF/%	MRs of the B-BF/%	MRs of the F&B-BF/%
1	71.7	89.1	51.3	61.9	1	86.9	96.3	60.3	74.3	1	91.9	99.1	64.3	78.6	1	66.2	86.1	39.1	53.1
2	72.2	88.7	50.7	62.1	2	87.1	96.5	61.1	73.2	2	92.3	98.5	63.7	79.3	2	65.8	85.7	38.7	52.8
3	71.2	89	50.3	61.8	3	86.5	96.2	60.5	73.5	3	93.1	99.3	65.1	79.5	3	65.5	85.9	37.9	52.3
4	70.6	88.6	50.5	62	4	86.7	96.4	59.7	73.1	4	91.2	100	64.7	78.8	4	65.1	85.5	37.5	51.9
5	71.1	88.4	49.7	60.9	5	87.2	95.9	58.6	72.5	5	91.7	99.4	64.2	78.4	5	64.8	85.3	36.5	51.2
6	70.5	87.7	49.3	61.1	6	86.3	96.1	58.1	72.7	6	92.4	98.8	63.6	78.6	6	64.4	85.4	36.1	50.5
7	69.4	88.1	48.7	60.3	7	85.2	95.7	57.6	71.7	7	91.3	99.5	62.9	79.1	7	63.9	85.2	35.6	49.6
8	68.7	87.3	48.1	59.4	8	84.7	95.5	57.2	72.1	8	91.7	99.1	62.5	78.3	8	63.5	85.1	35.3	49.1
9	68.3	86.8	47.7	58.8	9	83.5	95.2	56.9	71.2	9	92.2	98.8	61.7	77.9	9	63.1	85.3	34.7	48.4
10	67.8	86.2	47.3	58.3	10	83.3	94.6	56.3	70.8	10	91.1	98.3	61.2	77.3	10	62.8	85	34.4	48.1
11	67.5	85.8	46.6	57.5	11	82.7	94.1	55.8	70.3	11	90.7	98.5	60.7	76.8	11	62.2	85.1	33.7	47.7
12	66.7	85.6	46.2	57.3	12	81.8	93.7	55.3	69.6	12	92.1	98.4	60.2	76.3	12	61.8	84.8	32.5	47.3
13	66.3	84.7	45.7	56.7	13	81.3	92.5	52.6	69.1	13	91.3	97.9	58.8	76.1	13	61.5	84.5	32.1	46.5
14	65.7	84.5	45.3	56.2	14	80.7	92	51.7	68.5	14	90.1	98.1	58.2	75.7	14	61.2	84.3	31.7	46.2
15	65.2	84.2	44.7	55.9	15	80.3	92.4	51.3	67.6	15	90.4	97.3	57.4	75.3	15	60.8	84.1	31.1	45.6
16	64.8	83.9	43.8	55.3	16	78.7	92.6	50.8	66.5	16	90.1	96.9	56.5	74.9	16	59.3	83.8	30.5	45.1

## Sheet: Fig.3
Fig.3
	B-BF at EBRT 120 s	error	B-BF at EBRT 90 s	error	B-BF at EBRT 60 s	error	F&B-BF at EBRT 120 s	error	F&B-BF at EBRT 90 s	error	F&B-BF at EBRT 60 s	error
REs of T/%	94.2	1.2	92.1	1	67.3	0.9	99.6	0.3	99.2	0.5	93.9	1.2
REs of E/%	90.3	0.8	86.8	0.9	52.7	0.7	98.5	0.6	96.4	1.1	90.3	0.9
REs of B/%	75.6	0.6	71.4	1	43.1	0.5	92.2	0.9	88.9	0.8	82.5	1.1
REs of p-X/%	71.3	0.5	65.6	0.8	38.7	1.1	89.6	0.7	85.8	1.2	81.7	1.3

## Sheet: Fig.4
Fig.4
Time	Toluene REs of B-BF	Toluene REs of F&B-BF	Ethylbenzene REs of B-BF	Ethylbenzene REs of F&B-BF	Benzene REs of B-BF	Benzene REs of F&B-BF	p-Xylene REs of B-BF	p-Xylene REs of F&B-BF
17	89.3	96.1	77.3	92.3	63.9	83.7	58.5	83.5
18	86.9	95.5	75.6	91.8	62.5	83.5	57.7	83
19	84.7	95.2	73.2	91.5	61.3	83.3	55.5	82.7
20	80.5	94.6	69.8	91.3	59.7	83.1	53.9	82.5
21	77.6	94.3	66.4	91	58.5	83	52.4	82
22	74.3	93.7	63.7	90.8	56.2	82.8	50.7	81.6
23	70.1	93.2	61.2	90.6	55.5	82.6	47.7	81.3
24	67.3	92.6	59.3	90.3	53	82.5	46.3	81.1

## Sheet: Fig.5
Fig.5
	the pressure drop at day 121/Pa	error	the pressure drop at day 176/Pa	error
F&B-BF	50	1.2	69	1.5
B-BF	83	2.1	118	2.1

## Sheet: Fig.6
Fig.6
Time	Toluene REs of F&B-BF/%	Toluene REs of B-BF/%	Ethylbenzene REs of F&B-BF/%	Ethylbenzene REs of B-BF/%	Benzene REs of F&B-BF/%	Benzene REs of B-BF/%	p-Xylene REs of F&B-BF/%	p-Xylene REs of B-BF/%
168	92.6	67.3	90.3	59.3	82.5	53	81.1	46
169	0	0	0	0	0	0	0	0
170	0	0	0	0	0	0	0	0
171	0	0	0	0	0	0	0	0
172	90.7	34.5	87.5	23.7	78.9	21.1	77.3	13.3
173	98.5	48.7	95.7	34.1	88.1	35.7	85.4	27.6
174	99.1	66.6	96.5	52.8	88.6	48.6	85.1	38.7
175	99.2	84.2	96.3	69.5	88.2	61.2	85.3	51.3
176	98.7	93.3	96.1	83.7	88.5	70.8	85.5	64.9
177	99.3	92.5	96.2	85.5	89	71.3	85.4	65.2
178	99.4	93.4	96.3	86.3	88.4	71.5	85.6	65.1

## Sheet: Fig.7
Fig.7
relative abundance/%	Pseudomonas	Hydrogenophaga	Thauera	Bacillus	Microbacterium	Alicyclobacillus	Others
B-BF	37.6	16.1	11.4	9.7	8.5	8.3	8.4
F&B-BF	33.4	12.2	9.1	7.6	5.4	14.7	17.6

## Sheet: Fig.8
Fig.8
relative abundance/%	Phialophora	Cladosporium	Exophiala	Others
B-BF	62.7	8.6	5.2	23.5
F&B-BF	73.8	7.1	3.9	15.2
